# Supplementary material
Source: Research Square preprint supplement (doi:10.21203/rs.3.rs-8680752/v1)
Supplement: Supplementary file 1 [file 2a09ba50e7a633d62447e0f0.docx]

**Supplementary Table 1.** Results of univariate logistic regression for feature selection. Cut-off for multivariate entry is p-value<0.2.

| Variable | OR | Standard error | Z | p-value | 95% CI: lower | 95% CI: upper |
| --- | --- | --- | --- | --- | --- | --- |
| Age | 1.055846 | .0147129 | 3.90 | <0.001 | 1.027399 | 1.08508 |
| Sex | 0.5 | 0.2243819 | -1.54 | 0.122 | 0.2074826 | 1.20492 |
| Last amount of lithium ingestion (acute/acute on chronic) | 1.000127 | .0000459 | 2.77 | 0.006 | 1.000037 | 1.000217 |
| Poisoning type | 8.768544 | 5.03532 | 3.78 | <0.001 | 2.845291 | 27.02268 |
| Coingestion | 0.2360248 | .1120831 | -3.04 | 0.002 | 0.0930552 | 0.5986526 |
| Time elapsed to ED admission | 1.000451 | 0.00026 | 1.73 | 0.083 | 0.9999414 | 1.000961 |
| Gastric lavage  before ED admission | 0.538462 | 0.5718219 | -0.58 | 0.560 | 0.0671766 | 4.316105 |
| Nausea | 0.8085106 | 0.3986221 | -0.43 | 0.666 | 0.3076208 | 2.124985 |
| Vomiting | 1.487685 | 0.7518197 | 0.79 | 0.432 | 0.5525172 | 4.005678 |
| Diarrhea | 1 | - | - | - | - | - |
| Ataxia or tremor | 6.470588 | 3.113629 | 3.88 | <0.001 | 2.519695 | 16.6165 |
| Other neurological manifestations | 6.057143 | 2.735176 | 3.99 | <0.001 | 2.499755 | 14.67703 |
| History of lithium poisoning | 1.925837 | 1.062353 | 1.19 | 0.235 | 0.6532359 | 5.67765 |
| Allergy | 1 | - | - | - | - | - |
| Ischemic heart disease | 2.8 | 2.417933 | 1.19 | 0.233 | 0.5153533 | 15.21286 |
| Hypertension | 2.32 | 1.958187 | 1.00 | 0.319 | 0.443644 | 12.13225 |
| Hyperthyroidism | 1 | - | - | - | - | - |
| Hypothyroidism | 2.8 | 2.417933 | 1.19 | 0.233 | 0.5153533 | 15.21286 |
| Diabetes mellitus | 7.375 | 6.231692 | 2.36 | 0.018 | 1.407725 | 38.63725 |
| Hepatic disorders | 1 | - | - | - | - | - |
| Renal disorders | 1 | - | - | - | - | - |
| Neurological disorders | 2.062112 | 1.255911 | 1.19 | 0.235 | 0.6250224 | 6.803444 |
| Psychiatric disorders | 1 | - | - | - | - | - |
| GCS | 0.7227425 | 0.0561322 | -4.18 | <0.001 | 0.6206897 | 0.8415747 |
| Pulse oximetry | 0.9659071 | 0.0669706 | -0.50 | 0.617 | 0.8431752 | 1.106504 |
| Heart rate | 1.008635 | 0.0139105 | 0.62 | 0.533 | 0.9817359 | 1.036271 |
| Respiratory rate | 1.002161 | 0.0753795 | 0.03 | 0.977 | 0.8647935 | 1.161347 |
| Systolic blood pressure | 1.022947 | 0.0147238 | 1.58 | 0.115 | 0.9944923 | 1.052216 |
| Diastolic blood pressure | 1.003988 | 0.0193035 | 0.21 | 0.836 | 0.9668578 | 1.042544 |
| Temperature (Celsius) | 2.777637 | 1.573163 | 1.80 | 0.071 | 0.9153406 | 8.428848 |
| Hemoglobin | 0.8529846 | 0.1047839 | -1.29 | 0.196 | 0.6704653 | 1.085191 |
| White blood cell count | 1.186564 | 0.0740388 | 2.74 | 0.006 | 1.049973 | 1.340924 |
| Platelet count | 0.9980371 | 0.0030835 | -0.64 | 0.525 | 0.9920118 | 1.004099 |
| Hematocrit | 0.9497502 | 0.0456325 | -1.07 | 0.283 | 0.8643942 | 1.043535 |
| Aspartate transaminase | 1.009004 | 0.0047752 | 1.89 | 0.058 | 0.9996882 | 1.018407 |
| Alanine transaminase | 0.99921 | 0.0112626 | -0.07 | 0.944 | 0.9773778 | 1.02153 |
| Alkaline phosphatase | 1.005275 | 0.0018091 | 2.92 | 0.003 | 1.001735 | 1.008827 |
| Prothrombin time | 1.172345 | 0.1676855 | 1.11 | 0.266 | 0.8857364 | 1.551695 |
| International normalized ratio | 4.77153 | 6.658153 | 1.12 | 0.263 | 0.3096692 | 73.52198 |
| Partial thromboplastin time | 0.9633187 | .0442161 | -0.81 | 0.416 | 0.8804405 | 1.053998 |
| Lactate dehydrogenase | 1.001136 | 0.0008023 | 1.42 | 0.157 | 0.9995647 | 1.00271 |
| Creatine phosphokinase | 1.000075 | 0.0000482 | 1.55 | 0.120 | 0.9999805 | 1.000169 |
| Serum urea | 1.037885 | 0.0119799 | 3.22 | 0.001 | 1.014669 | 1.061633 |
| Creatinine | 6.794607 | 3.153239 | 4.13 | 0.000 | 2.736145 | 16.8729 |
| Blood sugar | 1.010111 | 0.0074998 | 1.35 | 0.175 | 0.995518 | 1.024918 |
| Serum sodium | 0.9365268 | 0.0615874 | -1.00 | 0.319 | 0.823273 | 1.06536 |
| Serum potassium | 2.653054 | 1.07226 | 2.41 | 0.016 | 1.2015 | 5.858257 |
| Venous Blood gas: pH | .0571385 | .2234407 | -0.73 | 0.464 | 0.0000268 | 121.7758 |
| Venous Blood gas: HCO3 | 1.022354 | 0.023487 | 0.96 | 0.336 | 0.9773411 | 1.06944 |
| Venous Blood gas: pCO2 | 1.012669 | 0.0275046 | 0.46 | 0.643 | 0.9601707 | 1.068038 |
| Venous Blood gas: pO2 | 0.9998497 | 0.0106175 | -0.01 | 0.989 | 0.9792549 | 1.020878 |
| First lithium concentration | 4.356595 | 1.278583 | 5.01 | <0.001 | 2.450951 | 7.743899 |

**Supplementary Table 2.** Results of Firth multivariate logistic regression on univariate analysis-selected features.

| Hemodialysis | OR | Standard error | Z | p-value | 95% CI: lower | 95% CI: upper |
| --- | --- | --- | --- | --- | --- | --- |
| Age | 1.030683 | .070053 | 0.44 | 0.657 | .9021335 | 1.177549 |
| sex | .8788472 | 1.620987 | -0.07 | 0.944 | .0236547 | 32.65195 |
| Last amount ingestion | 1.000057 | .0001028 | 0.55 | 0.580 | .9998554 | 1.000259 |
| Toxicity type |  |  |  |  |  |  |
| Acute on chronic | 1.122326 | 1.994422 | 0.06 | 0.948 | .0344744 | 36.53769 |
| Chronic | .041075 | .439243 | -0.30 | 0.765 | 3.24e-11 | 5.20e+07 |
| Time elapsed to ED admission | 1.000523 | .0007988 | 0.66 | 0.512 | .9989588 | 1.00209 |
| Coingestion | .1159815 | .26945 | -0.93 | 0.354 | .0012214 | 11.01318 |
| Ataxia or tremor | 2.206153 | 4.354905 | 0.40 | 0.689 | .0460659 | 105.6554 |
| Other neurological manifestations | 1.239697 | 2.060185 | 0.13 | 0.897 | .0477254 | 32.2019 |
| Diabetes mellitus | .8865854 | 5.044974 | -0.02 | 0.983 | .0000127 | 61851.24 |
| GCS on admission | .8886309 | .3562007 | -0.29 | 0.768 | .4050642 | 1.94948 |
| Systolic blood pressure on admission | .9979908 | .0453375 | -0.04 | 0.965 | .912972 | 1.090927 |
| Temperature | .9552607 | 1.445937 | -0.03 | 0.976 | .0491694 | 18.55876 |
| Hemoglobin | .9530242 | .4091417 | -0.11 | 0.911 | .4108428 | 2.210713 |
| White blood cell count | 1.018446 | .2642451 | 0.07 | 0.944 | .612472 | 1.693519 |
| Aspartate transaminase | 1.060937 | .0471949 | 1.33 | 0.184 | .972355 | 1.15759 |
| Alkaline phosphatase | .9991945 | .0086028 | -0.09 | 0.925 | .9824748 | 1.016199 |
| Lactate dehydrogenase | .9994303 | .0031263 | -0.18 | 0.855 | .9933217 | 1.005577 |
| Creatine phosphokinase | .9993194 | .0009792 | -0.69 | 0.487 | .9974021 | 1.00124 |
| Serum urea | .9847269 | .0550302 | -0.28 | 0.783 | .8825666 | 1.098713 |
| Creatinine | 1.347004 | 6.992267 | 0.06 | 0.954 | .0000514 | 35313.08 |
| Blood sugar | .9979442 | .032587 | -0.06 | 0.950 | .9360757 | 1.063902 |
| Potassium | 1.203006 | 1.982373 | 0.11 | 0.911 | .047601 | 30.40322 |
| First lithium concentration | 1.050287 | 1.14903 | 0.04 | 0.964 | .1230498 | 8.964695 |

**Supplementary Table 3.** Logistic Regression Results for Bedside Hemodialysis Risk Score.

| **Predictor Category** | **Coefficient (Log-Odds)** | **Odds Ratio (Exp[β])** | **Assigned Points** |
| --- | --- | --- | --- |
| **First Serum Lithium 1–2 mEq/L** | 0.8857 | 2.43 | 1 |
| **First Serum Lithium 2–3 mEq/L** | 3.4354 | 31.10 | 4 |
| **First Serum Lithium >3 mEq/L** | 5.7530 | 316.51 | 6 |
| **Severe Neurological Manifestations (Yes)** | 2.1491 | 8.57 | 2 |
| **GCS <9** | 1.8489 | 6.35 | 2 |
| **Hemoglobin 12.5–13.0 g/dL** | 1.3681 | 3.93 | 2 |
| **Hemoglobin <12.5 g/dL** | 1.5972 | 4.94 | 2 |
| **Age >30 years** | 1.0485 | 2.85 | 1 |
| **alkaline phosphatase>170 IU/L** | 0.3443 | 1.41 | 0 |
